# Supplementary material
Source: PubMed Central journal article supplement (PMC6054818)
Supplement: NIHMS952128-supplement-Supplement.pdf [file NIHMS952128-supplement-Supplement.pdf]

**Supplemental Material**

**A Model of Neglect During Postnatal Life Heightens Obesity-Induced  
Hypertension in Adult Male and Female C57BL/6 Mice**

Margaret O. Murphy, Joseph B. Herald, Jacqueline Leachman, Alejandro Villasante  
Tezanos, Dianne M. Cohn and Analia S. Loria

Department of Pharmacology and Nutritional Sciences, University of Kentucky

Lexington, KY

**Short title: Early life stress and cardiometabolic risk**

**Correspondence to:**

Analia S. Loria, PhD.

Assistant Professor

University of Kentucky

Department of Pharmacology and Nutritional Sciences

900 S. Limestone Street, 562 C.T. Wethington Building

Lexington, KY 40536-0200

Phone: 859-218-1414

email: [Analia.loria@uky.edu](mailto:Analia.loria@uky.edu)

## **Magnetic Resonance Imaging Analysis**

Female mice fed a HF diet for 9 weeks were imaged on a 7T CliniScan MRI (Bruker, Ettlingen, Germany) using a 2 point Dixon technique and a 72 mm diameter circularly polarized transmit receive coil at the Magnetic Resonance Imaging and Spectroscopy Center at the University of Kentucky. Anesthesia was induced and maintained using 1-2 % isoflurane in oxygen at a rate of 1.0 L/min. Respiration and temperature was monitored. Temperature was maintained between 36-37 °C using a water bath and tubing. Image data sets including a fat only and water only image were obtained using a dual echo Flash sequence with TR 12ms, TE 2ms and 3.5ms, flip 15°, FOV 80mm x 57.5mm x 31.7, and resolution 0.18mm x 0.18 mm x 0.18 mm. FSL software (<http://www.fmrib.ox.ac.uk/fsl>) was used for image analysis. The fat image was resampled to 1.8mm x 0.18mm x 0.18mm using FSL. Both the visceral cavity and total body cavity were segmented out manually. The total fat volume was calculated by taking a histogram from the fat only image of the visceral cavity and including voxels that were greater than 80% of the fat peak. 80% was chosen to include adipose tissue and exclude voxels from the liver. For subcutaneous analysis, the visceral cavity was subtracted from the total body cavity and total fat volume was calculated in similar fashion for visceral fat.

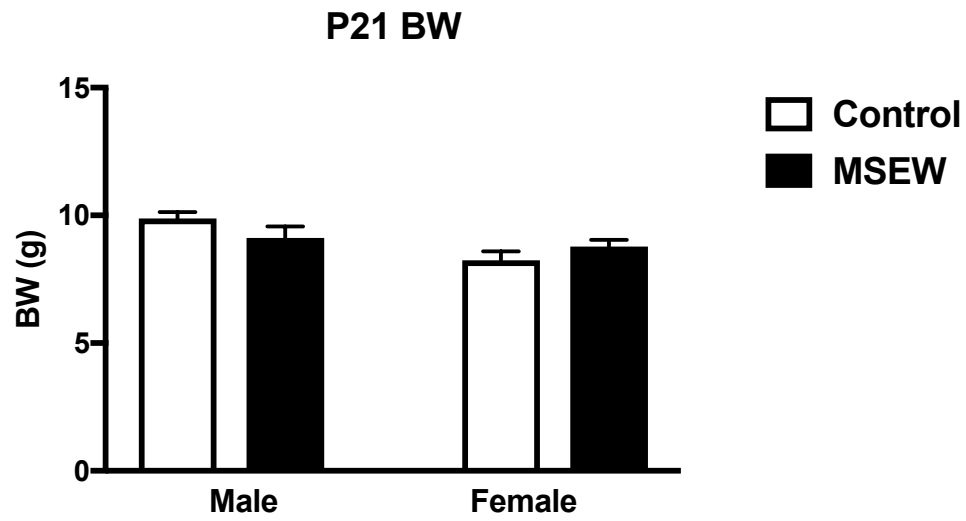

**Supplemental figure 1. Body weight in male and female mice at postnatal day 21. MSEW does not affect BW between groups. N=6-8 each group.**

**Control\_F\_HF**

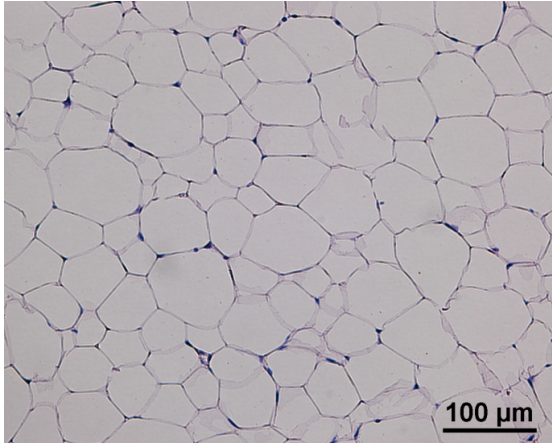

**MSEW\_F\_HF**

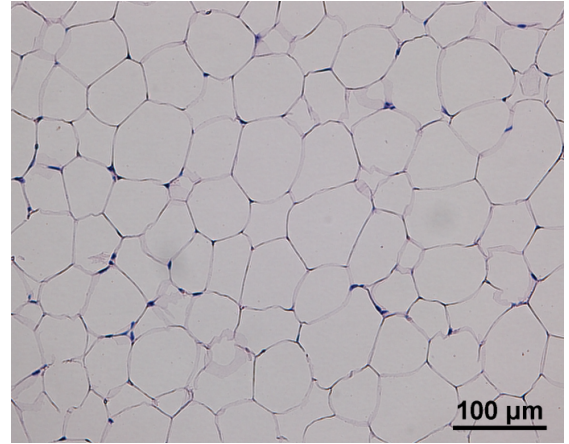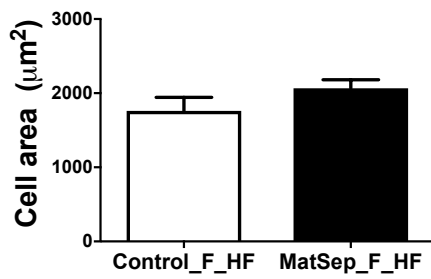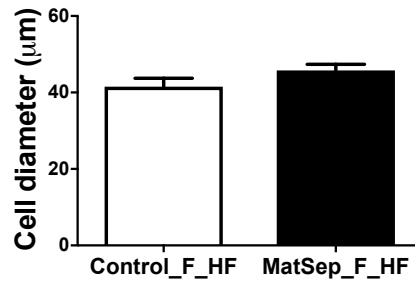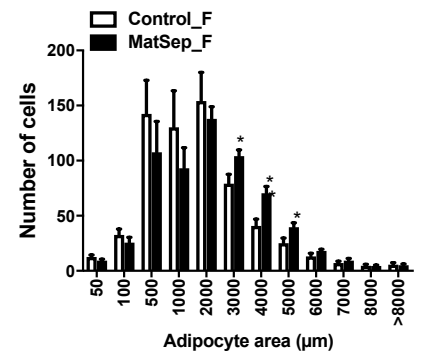

**Supplemental figure 2. Adult female mice fed a HF diet do not show significant changes in scWAT.** Representative H&E staining images from scWAT sections showing similar cell area and diameter in control and MatSep mice. Scale bar for bottom panels, 100 μm. N=5 per group.

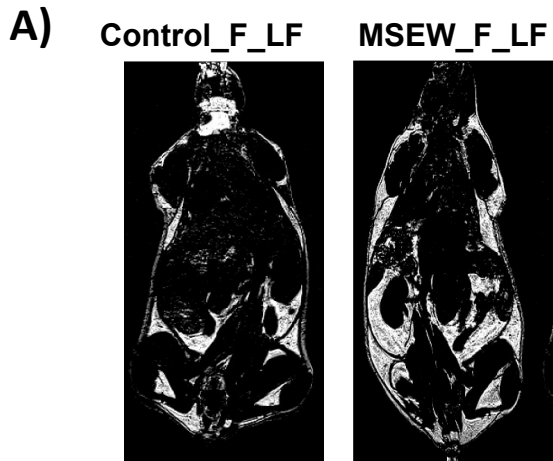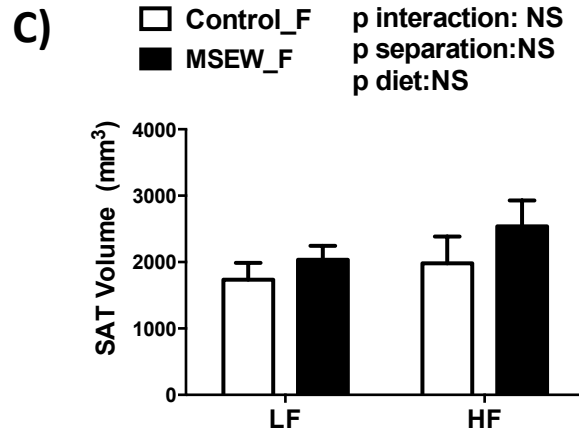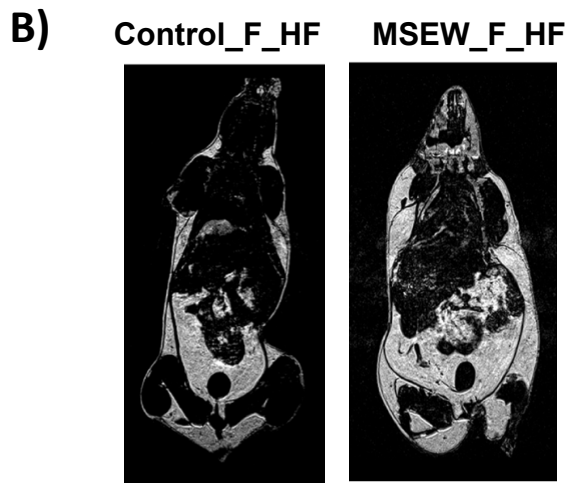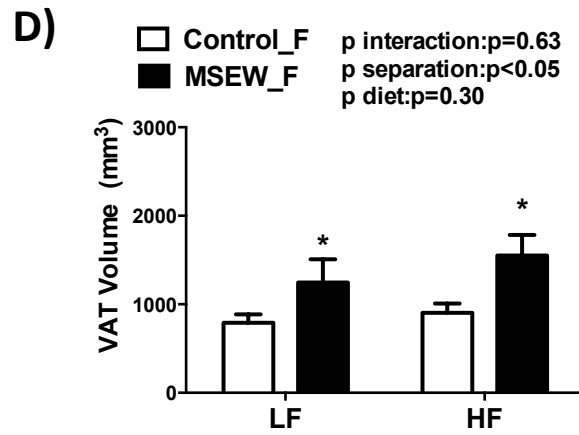

**Supplemental figure 3.** MSEW effect on fat distribution in female mice fed LF or HF diet for 9 weeks. A) Representative MRI images in LF diet fed mice B) Representative MRI images in HF diet fed mice C) SAT volume (mm<sup>3</sup>) D) VAT volume (mm<sup>3</sup>). N=3-5 per group.

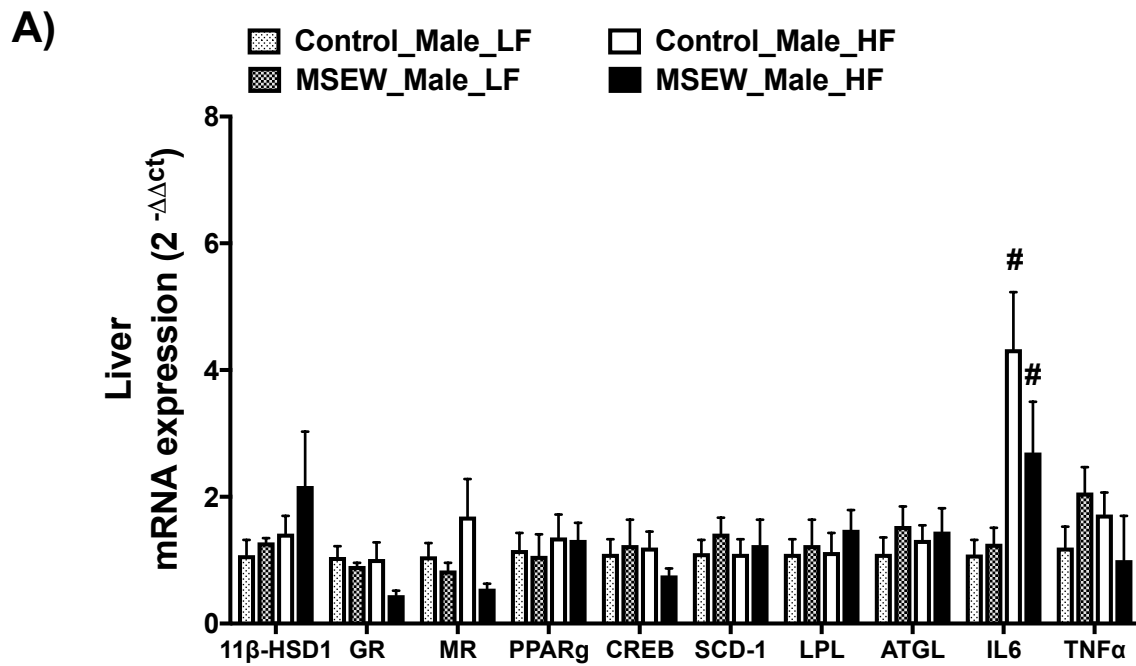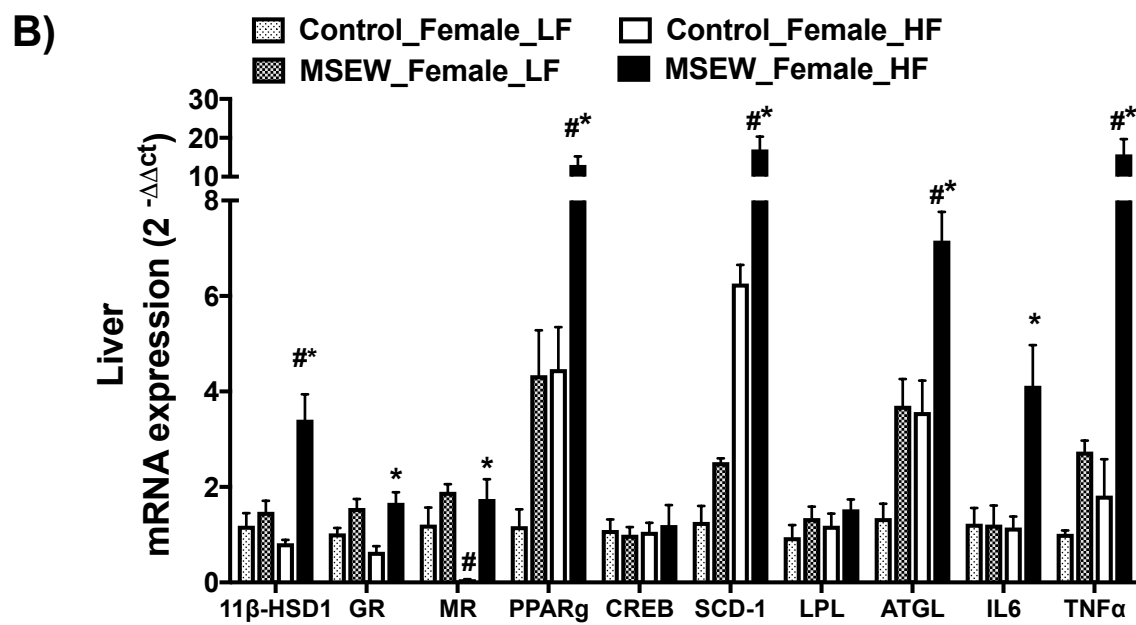

Supplemental figure 4. Gene expression in liver after 16 weeks on LF or HF diet. N=5-8 each group.

**Table S1.** Tissue weights in male and female mice fed during 16 weeks on LF or HF diet, g=gonadal, pr=perirenal, sc=subcutaneous, WAT=white adipose tissue, BAT=brown adipose tissue, LV/H= left ventricle/heart ratio, FI= food intake. N=6-8 per group. \* P separation <0.05, # P diet <0.05, P interaction=NS.

|                     |               | <b>Control<br/>LF</b> | <b>MSEW<br/>LF</b> | <b>Control<br/>HF</b> | <b>MSEW<br/>HF</b> |
|---------------------|---------------|-----------------------|--------------------|-----------------------|--------------------|
| <b>LV/H ratio</b>   | <b>Male</b>   | 0.78±0.05             | 0.71±0.02          | 0.75±0.01             | 0.71±0.01          |
|                     | <b>Female</b> | 0.81±0.06             | 0.78±0.05          | 0.71±0.01             | 0.69±0.09          |
| <b>Liver (g)</b>    | <b>Male</b>   | 1.27±0.09             | 1.37±0.05          | 1.32±0.13             | 1.51±0.43#         |
|                     | <b>Female</b> | 1.1±0.08              | 1.20±0.12          | 1.01±0.06             | <b>1.27±0.07*</b>  |
| <b>Kidney (mg)</b>  | <b>Male</b>   | 320±20                | 300±10             | 340±10                | 350±16             |
|                     | <b>Female</b> | 240±10                | 250±20             | 280±20                | 250±10             |
| <b>Adrenal (mg)</b> | <b>Male</b>   | 7.6±1.0               | 6.8±1.3            | 5.7±0.5               | 6.2±0.1            |
|                     | <b>Female</b> | 9.5±0.8               | 9.9±1.2            | 11.8±1.6#             | 10.2±1.5#          |
| <b>Spleen (mg)</b>  | <b>Male</b>   | 100±10                | 100±10             | 90±10                 | 100±10             |
|                     | <b>Female</b> | 160±10                | 140±7              | 110±10#               | 100±5#             |
| <b>gWAT (mg)</b>    | <b>Male</b>   | 1270±220              | 1258±160           | 2020±230#             | 2350±200#          |
|                     | <b>Female</b> | 440±50                | 500±20             | <b>1560±410#</b>      | <b>1940±340#*</b>  |
| <b>pr WAT (mg)</b>  | <b>Male</b>   | 410±90                | 470±60             | 1020±100#             | 1140±100#          |
|                     | <b>Female</b> | 300±30                | 230±50             | 660±70#               | 840±50#            |
| <b>sc WAT (mg)</b>  | <b>Male</b>   | 490±90                | 490±40             | 1210±200#             | 1490±170#          |
|                     | <b>Female</b> | 260±20                | 350±50             | <b>650±140#</b>       | <b>1120±340#*</b>  |
| <b>BAT (mg)</b>     | <b>Male</b>   | 150±20                | 180±40             | 330±50#               | 410±25#            |
|                     | <b>Female</b> | 70±10                 | 80±20              | 150±30#               | 160±10#            |
| <b>FI (g/day)</b>   | <b>Male</b>   | 4.3±0.1               | 4.6±0.6            | 3.07±0.23#            | 3.51±0.15#         |
|                     | <b>Female</b> | 3.2±0.1               | 3.4±0.2            | 2.28±0.09#            | 2.53±0.22#         |
| <b>FI (g/day)</b>   | <b>Male</b>   | 4.3±0.1               | 4.6±0.6            | 3.07±0.23#            | 3.51±0.15#         |
|                     | <b>Female</b> | 3.2±0.1               | 3.4±0.2            | 2.28±0.09#            | 2.53±0.22#         |

**Table S2.** Food intake in male and female mice fed during 7 or 14 weeks on LF or HF diet, measured for 5 consecutive days. FI= food intake. N=6-8 per group. # P diet <0.05.

|                               |               | <b>Control<br/>LF</b> | <b>MSEW<br/>LF</b> | <b>Control<br/>HF</b> | <b>MSEW<br/>HF</b> |
|-------------------------------|---------------|-----------------------|--------------------|-----------------------|--------------------|
| <b>FI week 7<br/>(g/day)</b>  | <b>Male</b>   | 2.8±0.3               | 2.4±0.7            | 2.1±0.3#              | 1.9±0.6#           |
|                               | <b>Female</b> | 2.2±0.4               | 2.0±0.2            | 1.6±0.1#              | 1.3±0.5#           |
| <b>FI week 14<br/>(g/day)</b> | <b>Male</b>   | 4.3±0.1               | 4.6±0.3            | 3.1±0.2#              | 3.5±0.1#           |
|                               | <b>Female</b> | 3.2±0.1               | 3.4±0.2            | 2.3±0.1#              | 2.5±0.2#           |



**Table S3.** mRNA levels of the 18S housekeeping gene by RT-PCR in gWAT and liver.

| 18S (2-ddct) |               | Control<br>LF | MSEW<br>LF | Control<br>HF | MSEW<br>HF |
|--------------|---------------|---------------|------------|---------------|------------|
| <b>gWAT</b>  | <b>Male</b>   | 14.0±0.3      | 14.4±0.6   | 13.4±1.1      | 14.2±1.5   |
|              | <b>Female</b> | 15.4±1.2      | 14.3±0.5   | 14.9±0.5      | 15.3±0.2   |
| <b>Liver</b> | <b>Male</b>   | 11.7±0.2      | 11.8±0.2   | 12.0±0.4      | 11.5±0.2   |
|              | <b>Female</b> | 17.2±0.1      | 17.4±0.2   | 17.3±0.2      | 17.6±0.3   |

**Table S4.** RT-PCR primers sequence.

|                                | 5' Forward 3'            | 5' Reverse 3'          |
|--------------------------------|--------------------------|------------------------|
| <b>11β-HSD1</b>                | GGAAGGTCTCCAGAAGGTAGTGTC | GAGGCTGCTCCGAGTTCAAG   |
| <b>GR</b>                      | CGGGACCACCTCCCAA         | CCCATAATGGCATAACCGAA   |
| <b>MR</b>                      | GTGGACAGTCCTTTCACTACCG   | TGACACCCAGAAGCCTCATCTC |
| <b>PPAR<math>\gamma</math></b> | GCCCTTTGGTGACTTTATGGA    | GCAGCAGGTTGTCTTGGATG   |
| <b>CREB</b>                    | ACCAGCAGAGTGGAGATGCT     | ATGGCAATGTACTGCCACT    |
| <b>SCD-1</b>                   | CTGTACGGGATCATACTGGTTC   | GCCGTGCCTTGTAAGTTCTG   |
| <b>LPL</b>                     | ACTCGCTCTCAGATGCCCTA     | TTGTGTTGCTTGCCATTCTC   |
| <b>ATGL</b>                    | TGTGGCCTCATTCTCTAC       | TCGTGGATGTTGGTGGAGCT   |
| <b>IL6</b>                     | TAGTCCTTCTACCCCAATTTCC   | TTGGTCCTTAGCCACTCCTTC  |
| <b>TNF<math>\alpha</math></b>  | CCCACTCTGACCCCTTTACTC    | TCACTGTCCCAGCATCTTGT   |
| <b>House-keeper</b>            |                          |                        |
| <b>18S</b>                     | AGTCGGCATCGTTTATGGTC     | CGAAGCATTGCCAAGAAT     |

**Table S5.** Fasting glucose in mice fed a LF or HF for 16 weeks. N=8-14 per group. # P <0.05 vs. LF.

|                            |               | <b>Control<br/>LF</b> | <b>MSEW<br/>LF</b> | <b>Control<br/>HF</b> | <b>MSEW<br/>HF</b> |
|----------------------------|---------------|-----------------------|--------------------|-----------------------|--------------------|
| <b>Glucose<br/>(mg/dl)</b> | <b>Male</b>   | 108.4±5.2             | 107.4±3.8          | 117.1±5.0             | 125.1±4.3 #        |
|                            | <b>Female</b> | 104.7±4.5             | 102.3±5.3          | 103.8±7.2             | 119.5±5.8 #        |
